# Supplementary material
Source: HighWire-hosted journal article supplement (https://bmjopenrespres.bmj.com/content/suppl/2022/01/19/9.1.e001095)

**Supplemental figure 1.** Simplified directed acyclic graph with confounders in red boxes and mediators in green boxes.

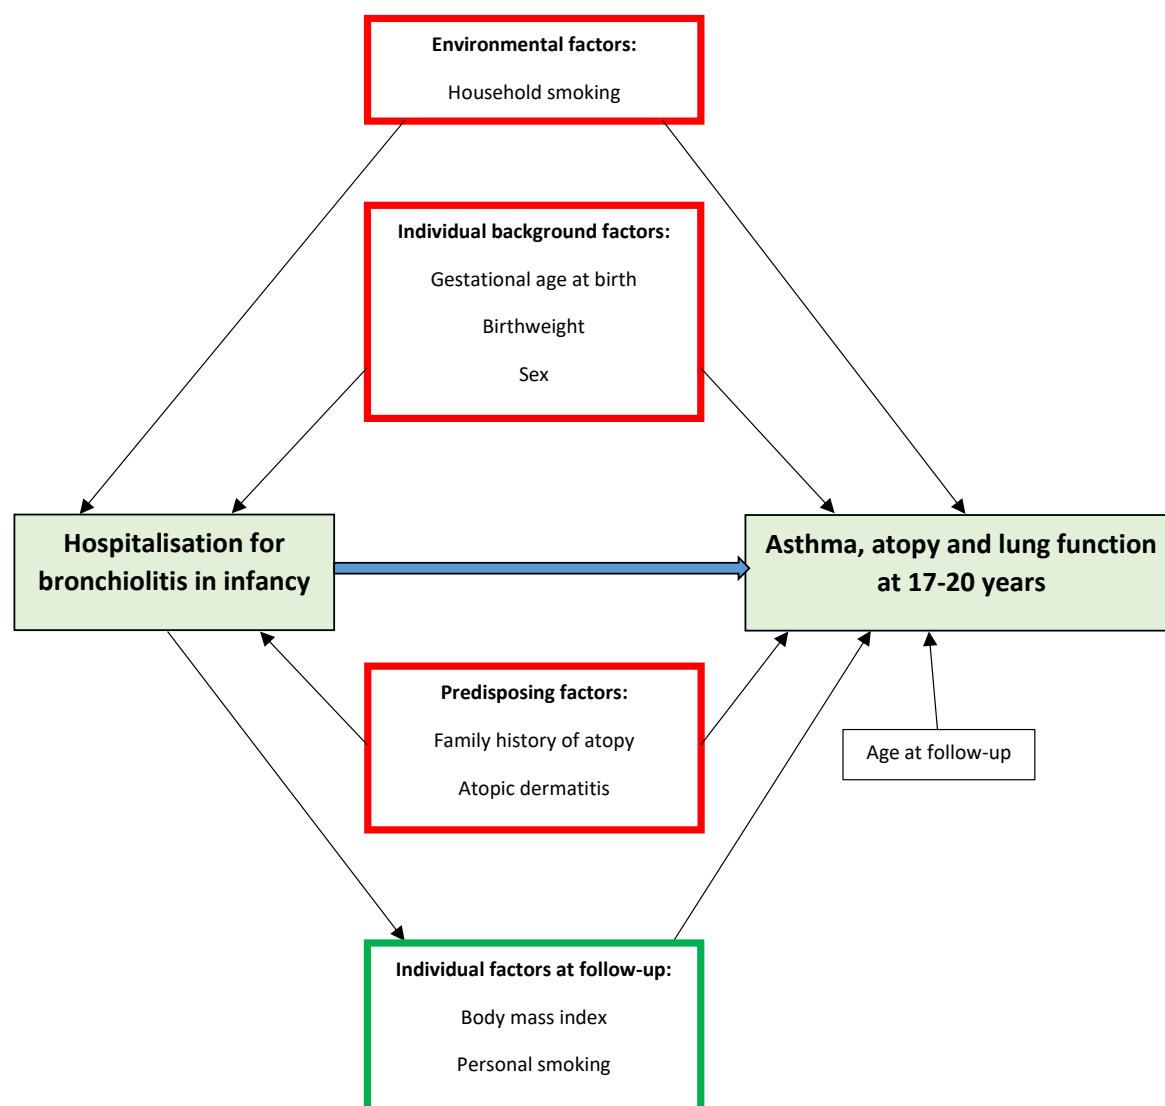

Supplement: bmjresp-2021-001095supp002_data_supplement.pdf [file bmjresp-2021-001095supp002_data_supplement.pdf]
